# Supplementary material
Source: PubMed Central journal article supplement (PMC7667967)

**Supporting Information for:**

***O*-Fucosylation of ADAMTSL2 is required for secretion and is impacted by geleophysic dysplasia-causing mutations**

Ao Zhang<sup>1\*</sup>, Steven J. Berardinelli<sup>1\*</sup>, Christina Leonhard-Melief<sup>2,3</sup>, Deepika Vasudevan<sup>2,4</sup>, Ta-Wei Liu<sup>1</sup>, Andrew Taibi<sup>2,5</sup>, Sharee Giannone<sup>2,6</sup>, Suneel S. Apte<sup>7</sup>, Bernadette C. Holdener<sup>2</sup> and Robert S. Haltiwanger<sup>1,2,8</sup>

Contents:

Tables S1-S10

Figures S1-S4

**Supporting Information Tables:**

**Table S1. Site-directed mutagenesis primers for mouse ADAMTSL2 construct.**

| Clone       | Primer Name            | Sequence                                                | T <sub>m</sub> |
|-------------|------------------------|---------------------------------------------------------|----------------|
| N813Q       | ADAMTSL2_N813Q         | 5' - GGCTCAAGACTGGGAAAGGTGCCAAACCACCTGTGGGCGTGGTG - 3'  | 74.77°C        |
|             | ADAMTSL2_N813Q-r       | 5' - CACCAGGCCACAGGTGGTTTGGCACCTTCCAGTCTGAGCC - 3'      | 74.77°C        |
| T815V       | ADAMTSL2_T815V         | 5' - GGCTCAAGACTGGGAAAGGTGCAATACCGTGTGTGGGCGTGGTG - 3'  | 73.85°C        |
|             | ADAMTSL2_T815V-r       | 5' - CACCACGCCACACACGGTATTGCACCTTCCAGTCTGAGCC - 3'      | 73.85°C        |
| N813Q_T815V | ADAMTSL2_N813Q_T815V   | 5' - GGCTCAAGACTGGGAAAGGTGCCAAACCAGTGTGTGGGCGTGGTG - 3' | 74.77°C        |
|             | ADAMTSL2_N813Q_T815V-r | 5' - CACCACGCCACACACGGTATTGCACCTTCCAGTCTGAGCC - 3'      | 74.77°C        |
| G817R       | TSL2_G817R_s2          | 5' - CAATACCACCTGTAGGCGTGGTGTGAAAAAGCGGTTAGTTCTCTG - 3' | 70°C           |
|             | TSL2_G817R_s2-r        | 5' - GTTATGGTGGACATCCGCACCACACTTTTCGCCAATCAAGAGAC - 3'  | 70°C           |
| S641L       | TSL2_S641L             | 5' - GACCAGCAGCTGGAGTGAGTGCTTACGTACCTGTGGTGAGGGCC - 3'  | 74.77°C        |
|             | TSL2_S641L-r           | 5' - CTGGTCGTCGACCTCACTCACGAATGCATGGACACCCTCCCGG - 3'   | 74.77°C        |

**Table S2. Sequencing primers for mouse ADAMTSL2 construct.**

| Primer Name             | Sequence                       | T <sub>m</sub> |
|-------------------------|--------------------------------|----------------|
| <i>Adamtsl2</i> seq 1 F | 5' - GTGGGAGCTGTGGACAGGGC - 3' | 68.6           |
| <i>Adamtsl2</i> seq 1 R | 5' - GCCCTGTCCACAGCTCCCAC - 3' | 68.6           |
| <i>Adamtsl2</i> seq 2 F | 5' - CGGTACCAGCTCTGCAGAGT - 3' | 62.4           |
| <i>Adamtsl2</i> seq 2 R | 5' - ACTCTGCAGAGCTGGTACCG - 3' | 62.4           |
| <i>Adamtsl2</i> seq 3 F | 5' - TCAACACCTCCTCTGAGGC - 3'  | 58.9           |
| <i>Adamtsl2</i> seq 3 R | 5' - GCCTCAGAGGAGGTGTTGA - 3'  | 58.9           |
| <i>Adamtsl2</i> seq 4 F | 5' - CAGTGGACTGTCTCGGACTG - 3' | 59.4           |
| <i>Adamtsl2</i> seq 4 R | 5' - CAGTCCGAGACAGTCCACTG - 3' | 59.4           |
| <i>Adamtsl2</i> seq 5 F | 5' - GCAGCCCCTGAGATATAAGC - 3' | 58.91          |
| <i>Adamtsl2</i> seq 5 R | 5' - GCTTATATCTCAGGGGCTGC - 3' | 58.91          |

**Table S3: Trypsin Digestion of WT ADAMTSL2**

**Table S4: Chymotrypsin digestion of WT ADAMTSL2**

**Table S5: Trypsin digestion of S641L mutant of ADAMTSL2**

**Table S6: Chymotrypsin digestion of S641L mutant of ADAMTSL2**

**Table S7: Trypsin glycopeptides from WT ADAMTSL2 analyzed in Figure S2**

**Table S8: Chymotryptic glycopeptides from WT ADAMTSL2 analyzed in Figure S2**

**Table S9: Tryptic glycopeptides from S641L ADAMTSL2 used to generate Figure S4**

**Table S10: Chymotryptic glycopeptides from S641L ADAMTSL2 used to generate Figures S3 and S4**

**Supporting Information Figure Legends:**

**Figure S1. Sequence comparison of TSR3 and TSR6 from human and mouse ADAMTSL2.** Color coding as in Figure 1. Identity, colon; similarity, period.

```
TSR3 (Sequence identity: 95%)
Human:      CQPRWETSSWSECSRTCGEGYQFRVVRWCWKMLSPGFDSSVYSDLCEAAEAVRPEERKTCRNPACG
Mouse:      CQPRWETSSWSECSRTCGEGHQFRIVRCWKMLSPGFDSSVYSDLCEATEAVRPEERKTCRNPACG
Similarity: ::::::::::::::::::::::::::::::::::::::::::::::::::::::::::::::::::::::

TSR6 (Sequence identity: 96%)
Human:      HWLAQDWERCNTTCGRGVKKRLVLCMELANGKPQTRSGPECGLAKKPPEESTCFE
Mouse:      HWLAQDWERCNTTCGRGVKKRLVLCMELANGKPQIRSGPECGLARKPPEESTCFE
Similarity: ::::::::::::::::::::::::::::::::::::::::::::::::::::::::::::::::::::::
```

**Figure S2. Mass spectral mapping of TSRs from ADAMTSL2 modified with *O*-fucosylation and *C*-mannosylation.** mADAMTSL2 was expressed in WT HEK293T cells, purified from medium, reduced/alkylated, digested with proteases, and the resulting peptides were analyzed by nano-LC-MS/MS as described in Experimental Procedures. Glycopeptides were identified using Byonic. Spectra for the major glycoform of peptides from different TSRs are shown, and Extracted Ion Chromatograms (EICs) for each glycoform were generated using Xcaliber. Peptides are shown from TSR1 (A, B), TSR2 (C), TSR3 (D), TSR4 (E), TSR5 (F), TSR6 (G), and TSR7 (H, I). Data can be found in Supporting Information Tables S3, S4, S7 and S8.

**Figure S3. EIC and MS/MS of peptides from TSR3 in S641L ADAMTSL2.** Spectra and EIC of the peptide containing the S641L mutation from TSR3 is shown as in Figure S2. Data can be found in Supporting Information Tables S6 and S10.

**Figure S4. Mouse ADAMTSL2 GPHYSD1 S641L mutation reduced *O*-fucosylation of TSR3 but did not alter glycosylation of other TSRs.** (A) Relative abundance of GlcFuc disaccharide, *O*-fuc monosaccharide, and unmodified glycoforms on peptides from TSRs of mADAMTSL2 S641L containing the C-X-X-(S/T)-C *O*-fucose consensus site analyzed by mass spectral analyses as in Figure 2A. (B) Relative abundance of *C*-mannosylated forms of peptides from TSRs of mADAMTSL2 S641L containing W-X-X-(W/C) consensus sequence analyzed by mass spectral analyses as in Figure 2C. Data can be found in Supporting Information Tables S5, S6, S9, and S10.

Figure S2A

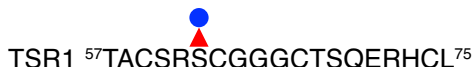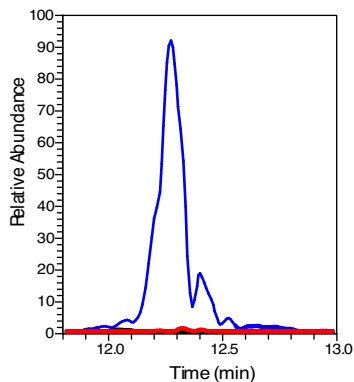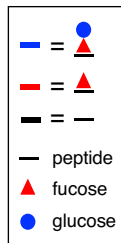

| #1 | b*         | b <sup>2*</sup> | b <sup>3*</sup> | b <sup>4*</sup> | Seq.         | y*         | y <sup>2*</sup> | y <sup>3*</sup> | y <sup>4*</sup> | #2 |
|----|------------|-----------------|-----------------|-----------------|--------------|------------|-----------------|-----------------|-----------------|----|
| 1  | 102.05496  | 51.53112        | 34.68984        | 26.26920        | T            |            |                 |                 |                 | 19 |
| 2  | 173.09207  | 87.04967        | 58.36887        | 44.02847        | A            | 2329.98057 | 1165.49392      | 777.33171       | 583.26060       | 18 |
| 3  | 333.12272  | 167.06500       | 111.71242       | 84.03614        | C-Carbami... | 2258.94346 | 1129.97537      | 753.65267       | 565.49132       | 17 |
| 4  | 420.15475  | 210.58101       | 140.72310       | 105.79414       | S            | 2098.91281 | 1049.96004      | 700.30912       | 525.48366       | 16 |
| 5  | 576.25586  | 288.63157       | 192.75680       | 144.81942       | R            | 2011.88078 | 1006.44403      | 671.29844       | 503.72565       | 15 |
| 6  | 971.39862  | 486.20295       | 324.47106       | 243.60511       | S-dHex(1)... | 1855.77967 | 928.39347       | 619.26474       | 464.70037       | 14 |
| 7  | 1131.42927 | 566.21827       | 377.81461       | 283.61277       | C-Carbami... | 1460.63691 | 730.82209       | 487.55049       | 365.91468       | 13 |
| 8  | 1188.45073 | 594.72900       | 396.82176       | 297.86814       | G            | 1300.60626 | 650.80677       | 434.20694       | 325.90702       | 12 |
| 9  | 1245.47219 | 623.23973       | 415.82892       | 312.12351       | G            | 1243.58479 | 622.29604       | 415.19978       | 311.65166       | 11 |
| 10 | 1302.49366 | 651.75047       | 434.83607       | 326.37887       | G            | 1186.56333 | 593.78530       | 396.19263       | 297.39629       | 10 |
| 11 | 1401.56207 | 701.28467       | 467.85887       | 351.14598       | V            | 1129.54187 | 565.27457       | 377.18547       | 283.14092       | 9  |
| 12 | 1502.60975 | 751.80851       | 501.54143       | 376.40789       | T            | 1030.47345 | 515.74037       | 344.16267       | 258.37382       | 8  |
| 13 | 1589.64178 | 795.32453       | 530.55211       | 398.16590       | S            | 929.42578  | 465.21653       | 310.48011       | 233.11190       | 7  |
| 14 | 1717.70036 | 859.35382       | 573.23830       | 430.18066       | Q            | 842.39375  | 421.70051       | 281.46843       | 211.35389       | 6  |
| 15 | 1846.74286 | 923.87511       | 616.25250       | 462.44119       | E            | 714.33517  | 357.67122       | 238.78324       | 179.33925       | 5  |
| 16 | 2002.84406 | 1001.92567      | 668.28620       | 501.46647       | R            | 585.29258  | 293.14993       | 195.76904       | 147.07860       | 4  |
| 17 | 2139.90297 | 1070.45512      | 713.97251       | 535.73120       | H            | 429.19147  | 215.09937       | 143.73534       | 108.05332       | 3  |
| 18 | 2299.93362 | 1150.47045      | 767.31606       | 575.73886       | C-Carbami... | 292.13255  | 146.56992       | 98.04904        | 73.78860        | 2  |
| 19 |            |                 |                 |                 | L            | 132.10191  | 66.55459        | 44.70549        | 33.78093        | 1  |

KZ040518\_4.raw #3477 RT: 12.2131 min  
 FTMS, 608.7625@hcd27.00, z=+4, Mono m/z=608.51202 Da, MH+=2431.02627 Da, Match Tol.=20 ppm

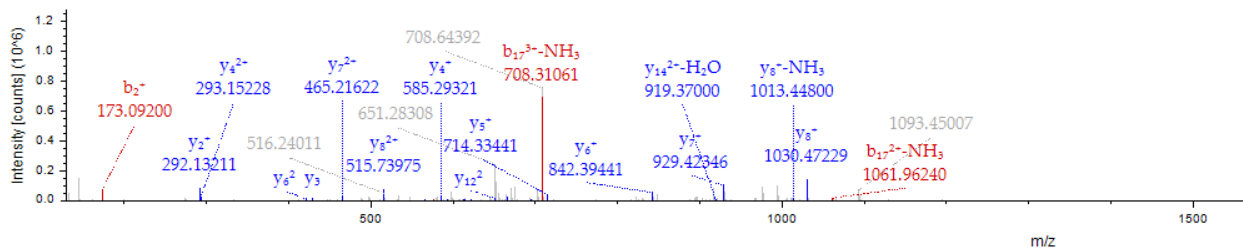

Figure S2B

TSR1 <sup>49</sup>WWGEWTKWTACSR<sup>5</sup>SCGGGVTSQERHCL<sup>75</sup>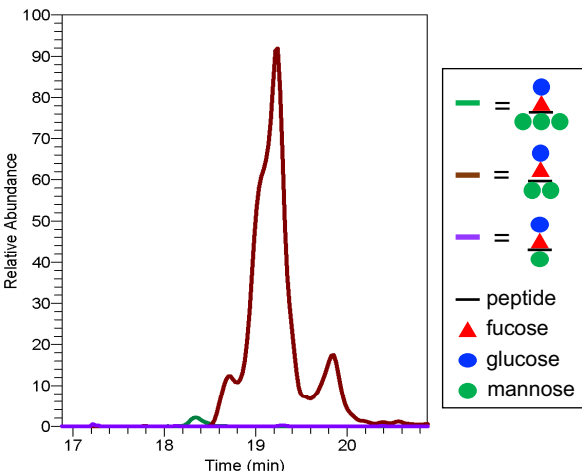

| #1 | b <sup>+</sup> | b <sup>2+</sup> | b <sup>3+</sup> | b <sup>4+</sup> | Seq.         | y <sup>+</sup> | y <sup>2+</sup> | y <sup>3+</sup> | y <sup>4+</sup> | #2 |
|----|----------------|-----------------|-----------------|-----------------|--------------|----------------|-----------------|-----------------|-----------------|----|
| 1  | 187.08659      | 94.04693        | 63.03371        | 47.52710        | W            |                |                 |                 |                 | 27 |
| 2  | 373.16590      | 187.08659       | 125.06015       | 94.04693        | W            | 3728.57853     | 1864.79290      | 1243.53103      | 932.90009       | 26 |
| 3  | 430.18737      | 215.59732       | 144.06731       | 108.30230       | G            | 3542.49922     | 1771.75325      | 1181.50459      | 886.38026       | 25 |
| 4  | 559.22996      | 280.11862       | 187.08150       | 140.56295       | E            | 3485.47776     | 1743.24252      | 1162.49474      | 872.12490       | 24 |
| 5  | 907.36210      | 454.18469       | 303.12555       | 227.59598       | W-Hex        | 3356.43516     | 1678.72122      | 1119.48324      | 839.86425       | 23 |
| 6  | 1008.40977     | 504.70853       | 336.80811       | 252.85790       | T            | 3008.30303     | 1504.65515      | 1003.43919      | 752.83121       | 22 |
| 7  | 1136.50474     | 568.75601       | 379.50643       | 284.88164       | K            | 2907.25535     | 1454.13131      | 969.75663       | 727.56929       | 21 |
| 8  | 1484.63687     | 742.82208       | 495.55048       | 371.91468       | W-Hex        | 2779.16038     | 1390.08383      | 927.05831       | 695.54555       | 20 |
| 9  | 1893.79528     | 947.40128       | 631.93661       | 474.20428       | T-dHex(1)    | 2431.02825     | 1216.01776      | 811.01427       | 608.51252       | 19 |
| 10 | 1964.83240     | 982.91984       | 655.61565       | 491.96356       | A            | 2021.86984     | 1011.43896      | 674.62813       | 506.22292       | 18 |
| 11 | 2124.86305     | 1062.93516      | 708.95920       | 531.97122       | C-Carbami... | 1950.83272     | 975.92000       | 650.94909       | 488.46364       | 17 |
| 12 | 2211.89508     | 1106.45118      | 737.96988       | 553.72923       | S            | 1790.80207     | 895.90468       | 597.60554       | 448.45598       | 16 |
| 13 | 2367.99619     | 1184.50173      | 790.00358       | 592.75450       | R            | 1703.77005     | 852.38866       | 568.59487       | 426.63975       | 15 |
| 14 | 2455.02821     | 1228.01775      | 819.01426       | 614.51251       | S            | 1547.66894     | 774.33811       | 516.56116       | 387.67269       | 14 |
| 15 | 2615.05886     | 1308.03307      | 872.35781       | 654.52017       | C-Carbami... | 1460.63691     | 730.82209       | 487.55049       | 365.91468       | 13 |
| 16 | 2672.08033     | 1336.54380      | 891.36496       | 668.77554       | G            | 1300.60626     | 650.80677       | 434.20694       | 325.90702       | 12 |
| 17 | 2729.10179     | 1365.05453      | 910.37211       | 683.03091       | G            | 1243.58479     | 622.29604       | 415.19978       | 311.65166       | 11 |
| 18 | 2786.12325     | 1393.56527      | 929.37927       | 697.28627       | G            | 1186.56333     | 593.78530       | 396.19263       | 297.39629       | 10 |
| 19 | 2885.19167     | 1443.09947      | 962.40207       | 722.05337       | V            | 1129.54187     | 565.27457       | 377.18547       | 283.14092       | 9  |
| 20 | 2986.23935     | 1493.62331      | 996.08463       | 747.31529       | T            | 1030.47345     | 515.74037       | 344.16267       | 258.37382       | 8  |
| 21 | 3073.27137     | 1537.13933      | 1025.09531      | 769.07330       | S            | 929.42578      | 465.21653       | 310.48011       | 233.11190       | 7  |
| 22 | 3201.32995     | 1601.16861      | 1067.78150      | 801.08795       | Q            | 842.39375      | 421.70051       | 281.46943       | 211.35389       | 6  |
| 23 | 3330.37255     | 1665.68991      | 1110.79570      | 833.34859       | E            | 714.33517      | 357.67122       | 238.78324       | 179.33925       | 5  |
| 24 | 3486.47366     | 1743.74047      | 1162.82940      | 872.37387       | R            | 585.29258      | 293.14993       | 195.76904       | 147.07860       | 4  |
| 25 | 3623.53257     | 1812.26992      | 1208.51571      | 906.63860       | H            | 429.19147      | 215.09937       | 143.73534       | 108.05332       | 3  |
| 26 | 3783.56322     | 1892.28525      | 1261.85926      | 946.64626       | C-Carbami... | 292.13255      | 146.56992       | 98.04904        | 73.78860        | 2  |
| 27 |                |                 |                 |                 | L            | 132.10191      | 66.55459        | 44.70549        | 33.78093        | 1  |

KZ051018\_5.raw #5701 RT: 19.2198 min

FTMS, 784.1348@hcd27.00, z=+5, Mono m/z=783.73505 Da, MH+=3914.64613 Da, Match Tol.=20 ppm

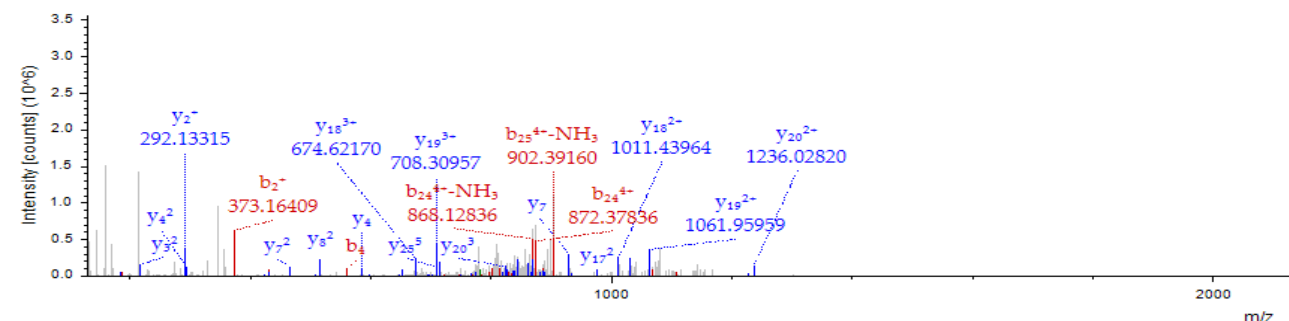

Figure S2C

TSR2<sup>576</sup>LSSHEPCSATICTTGVMSTYAMCVR<sup>599</sup>

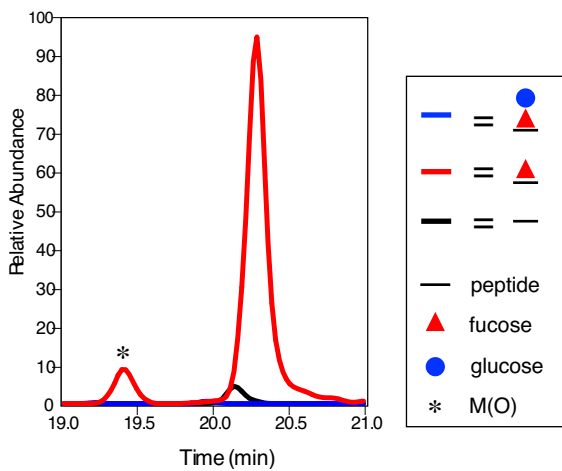

| #1 | b <sup>+</sup> | b <sup>2+</sup> | b <sup>3+</sup> | Seq.         | y <sup>+</sup> | y <sup>2+</sup> | y <sup>3+</sup> | #2 |
|----|----------------|-----------------|-----------------|--------------|----------------|-----------------|-----------------|----|
| 1  | 114.09134      | 57.54931        | 38.70196        | L            |                |                 |                 | 24 |
| 2  | 201.12337      | 101.06532       | 67.71264        | S            | 2739.11872     | 1370.06300      | 913.71109       | 23 |
| 3  | 288.15540      | 144.58134       | 96.72332        | S            | 2652.08669     | 1326.54698      | 884.70041       | 21 |
| 4  | 425.21431      | 213.11079       | 142.40962       | H            | 2565.05466     | 1283.03097      | 855.68974       | 22 |
| 5  | 554.25690      | 277.63209       | 185.42382       | E            | 2427.99575     | 1214.50151      | 810.00343       | 20 |
| 6  | 651.30967      | 326.15847       | 217.77474       | P            | 2298.95316     | 1149.98022      | 766.98924       | 19 |
| 7  | 811.34031      | 406.17380       | 271.11829       | C-Carbami... | 2201.90039     | 1101.45384      | 734.63832       | 18 |
| 8  | 898.37234      | 449.68981       | 300.12897       | S            | 2041.86975     | 1021.43851      | 681.29477       | 17 |
| 9  | 969.40946      | 485.20837       | 323.80800       | A            | 1954.83772     | 977.92250       | 652.28409       | 16 |
| 10 | 1216.51504     | 608.76116       | 406.17653       | T-dHex       | 1883.80060     | 942.40394       | 628.60505       | 15 |
| 11 | 1376.54569     | 688.77648       | 459.52008       | C-Carbami... | 1636.69502     | 818.85115       | 546.23652       | 14 |
| 12 | 1477.59337     | 739.30032       | 493.20264       | T            | 1476.66437     | 738.83582       | 492.89297       | 13 |
| 13 | 1578.64105     | 789.82416       | 526.88520       | T            | 1375.61669     | 688.31198       | 459.21041       | 12 |
| 14 | 1635.66251     | 818.33489       | 545.89236       | G            | 1274.56901     | 637.78814       | 425.52785       | 11 |
| 15 | 1734.73093     | 867.86910       | 578.91516       | V            | 1217.54755     | 609.27741       | 406.52070       | 10 |
| 16 | 1865.77141     | 933.38934       | 622.59532       | M            | 1118.47913     | 559.74320       | 373.49790       | 9  |
| 17 | 1952.80344     | 976.90536       | 651.60600       | S            | 987.43865      | 494.22296       | 329.81773       | 8  |
| 18 | 2053.85112     | 1027.42920      | 685.28856       | T            | 900.40662      | 450.70695       | 300.80706       | 7  |
| 19 | 2216.91445     | 1108.96086      | 739.64300       | Y            | 799.35894      | 400.18311       | 267.12450       | 6  |
| 20 | 2287.95156     | 1144.47942      | 763.32204       | A            | 636.29561      | 318.65144       | 212.77006       | 5  |
| 21 | 2418.99204     | 1209.99966      | 807.00220       | M            | 565.25850      | 283.13289       | 189.09102       | 4  |
| 22 | 2579.02269     | 1290.01498      | 860.34575       | C-Carbami... | 434.21801      | 217.61265       | 145.41086       | 3  |
| 23 | 2678.09111     | 1339.54919      | 893.36855       | V            | 274.18737      | 137.59732       | 92.06731        | 2  |
| 24 |                |                 |                 | R            | 175.11895      | 88.06311        | 59.04450        | 1  |

KZ040518\_3.raw #6759 RT: 20.2938 min

FIMS, 951.7415@hcd27.00, z=+3, Mono m/z=951.40662 Da, MH+=2852.20530 Da, Match Tol=20 ppm

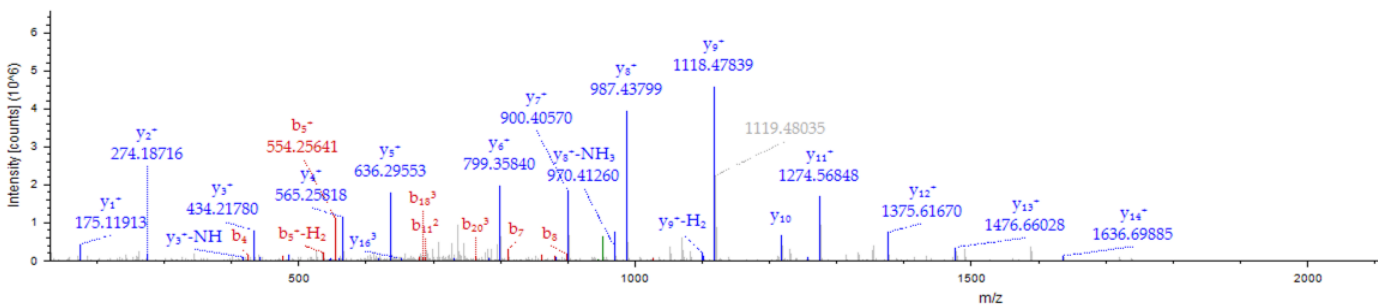

Figure S2D

TSR3 WT <sup>623</sup>CAGRECQPRWETSSWSECSRTC<sup>650</sup>GE<sup>650</sup>HQF

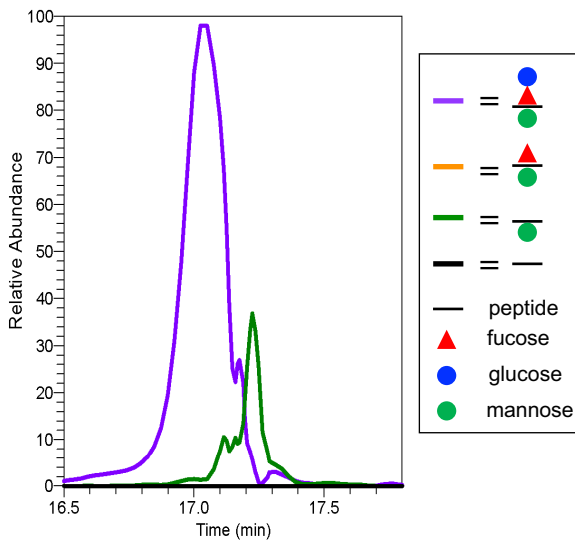

| #1 | b <sup>+</sup>   | b <sup>2+</sup>  | b <sup>3+</sup>   | b <sup>4+</sup>  | b <sup>5+</sup>  | Seq.         | y <sup>+</sup>    | y <sup>2+</sup>  | y <sup>3+</sup>  | y <sup>4+</sup>  | y <sup>5+</sup> | #2 |
|----|------------------|------------------|-------------------|------------------|------------------|--------------|-------------------|------------------|------------------|------------------|-----------------|----|
| 1  | 161.03793        | 81.02260         | 54.35083          | 41.01494         | 33.01341         | C-Carbami... |                   |                  |                  |                  |                 | 28 |
| 2  | 232.07504        | 116.54116        | 78.02886          | 58.74222         | 47.22083         | A            | 3755.52789        | 1878.26788       | 1252.51415       | 939.63743        | 751.91140       | 27 |
| 3  | 289.09650        | 143.05189        | 97.03702          | 73.02968         | 58.62512         | G            | 3684.49078        | 1842.74903       | 1228.83511       | 921.87015        | 737.70398       | 26 |
| 4  | 445.19761        | 223.10245        | 149.07072         | 112.05486        | 89.84534         | R            | 3627.46392        | 1814.23830       | 1209.82796       | 907.62279        | 726.29968       | 25 |
| 5  | <b>574.24021</b> | 287.62374        | 192.08492         | 144.31551        | 115.65386        | E            | 3471.36820        | 1736.18774       | 1157.79425       | <b>868.59751</b> | 695.07946       | 24 |
| 6  | 734.27085        | 367.63907        | 245.42847         | 184.32317        | 147.65999        | C-Carbami... | 3342.32561        | 1671.69644       | 1114.78005       | 836.33286        | 669.27094       | 23 |
| 7  | 862.32943        | 431.66835        | 288.11466         | 216.33782        | 173.27171        | Q            | 3182.29496        | 1591.65112       | 1061.43651       | 796.32920        | 637.26481       | 22 |
| 8  | 959.38220        | 480.19474        | 320.46558         | 240.60101        | 192.68226        | P            | 3054.23639        | 1527.62183       | 1018.75031       | 764.31455        | 611.65310       | 21 |
| 9  | 1115.48331       | <b>558.24529</b> | 372.49629         | 279.62628        | 223.90248        | R            | 2957.16362        | 1479.09545       | 986.39939        | 740.05136        | 582.24255       | 20 |
| 10 | 1301.56262       | <b>651.28495</b> | 434.52572         | 326.14611        | 261.11835        | W            | 2801.08251        | 1401.04489       | 934.36569        | 701.02609        | 561.02232       | 19 |
| 11 | 1430.60521       | <b>715.80624</b> | <b>477.53992</b>  | 358.40676        | 286.92686        | E            | 2615.00320        | 1308.00524       | 872.33925        | 654.50626        | 523.80846       | 18 |
| 12 | 1839.76362       | 920.38545        | 613.92806         | 460.69636        | 368.75855        | T-dHex(1)    | 2489.96060        | 1243.48394       | <b>829.32505</b> | 622.24561        | 497.99794       | 17 |
| 13 | 1926.79565       | 963.90146        | 642.93674         | 482.45437        | 386.16495        | S            | 2076.80219        | 1038.90474       | 692.93892        | 519.95601        | 416.16626       | 16 |
| 14 | 2013.82768       | 1007.41748       | 671.94741         | 504.21238        | 403.57135        | S            | 1989.77017        | 995.38272        | 663.92824        | 498.19800        | 388.75985       | 15 |
| 15 | 2361.95882       | 1181.48355       | 787.99146         | 591.24541        | 473.19778        | W-Hex        | 1902.73814        | 951.87271        | 634.91756        | 476.43999        | 381.35345       | 14 |
| 16 | 2448.99185       | 1224.99896       | 817.00213         | 613.00342        | 490.60419        | S            | <b>1554.60900</b> | <b>777.80264</b> | 518.87352        | 389.40696        | 311.72702       | 13 |
| 17 | 2578.03444       | 1289.52086       | 850.01633         | 645.26407        | 516.41721        | E            | 1467.57397        | <b>734.29062</b> | 498.86284        | 367.64895        | 294.32062       | 12 |
| 18 | 2738.06309       | 1369.53818       | 913.35888         | 685.27173        | 548.41884        | C-Carbami... | 1338.53138        | <b>689.78933</b> | 446.84864        | 335.38830        | 268.51210       | 11 |
| 19 | 2825.09712       | 1413.06220       | 942.37066         | 707.02974        | 565.82524        | S            | 1178.50073        | <b>588.75400</b> | 393.50609        | 295.38064        | 236.50597       | 10 |
| 20 | 2981.19823       | 1491.10275       | 994.40426         | 746.05501        | 597.04547        | R            | 1091.46870        | 546.23799        | 364.49442        | 273.62263        | 219.08956       | 9  |
| 21 | 3082.24590       | 1547.62659       | 1028.08682        | 771.31693        | 617.25500        | T            | <b>935.36759</b>  | 468.18743        | 312.46071        | 234.59736        | 187.87934       | 8  |
| 22 | 3242.27655       | 1621.64191       | 1081.43037        | 811.32460        | 649.26113        | C-Carbami... | <b>834.31991</b>  | 417.66359        | 278.77816        | 209.33544        | 167.66880       | 7  |
| 23 | 3299.29802       | 1650.15265       | <b>1100.43752</b> | <b>825.57996</b> | 660.66542        | E            | <b>674.28926</b>  | 337.64827        | 226.43461        | 169.32777        | 135.66367       | 6  |
| 24 | 3428.34051       | 1714.67394       | 1143.45172        | <b>857.84051</b> | 686.47394        | G            | 617.26780         | 309.13754        | 206.42745        | 155.07241        | 124.26938       | 5  |
| 25 | 3485.36207       | 1743.18468       | 1162.45888        | 872.09588        | 697.87824        | G            | <b>488.22521</b>  | 244.51624        | 163.41325        | 122.81176        | 98.5086         | 4  |
| 26 | 3622.42099       | 1811.71413       | 1208.14518        | 906.36070        | <b>725.29002</b> | H            | <b>431.20374</b>  | 216.10551        | 144.40610        | 108.55639        | 87.04657        | 3  |
| 27 | 3750.47956       | 1875.74342       | 1250.83137        | 938.37535        | 750.90173        | Q            | <b>294.14483</b>  | 147.57605        | 99.71890         | 74.29167         | 59.63479        | 2  |
| 28 |                  |                  |                   |                  |                  | F            | 166.08626         | 83.54677         | 56.03360         | 42.27702         | 34.02307        | 1  |

KZ051018\_5\_raw #4739 RT: 16.9557 min

FTMS, 784.3149@hcd27.00, z=+5, Mono m/z=783.91443 Da, MH+=3915.54304 Da, Match Tol=20 ppm

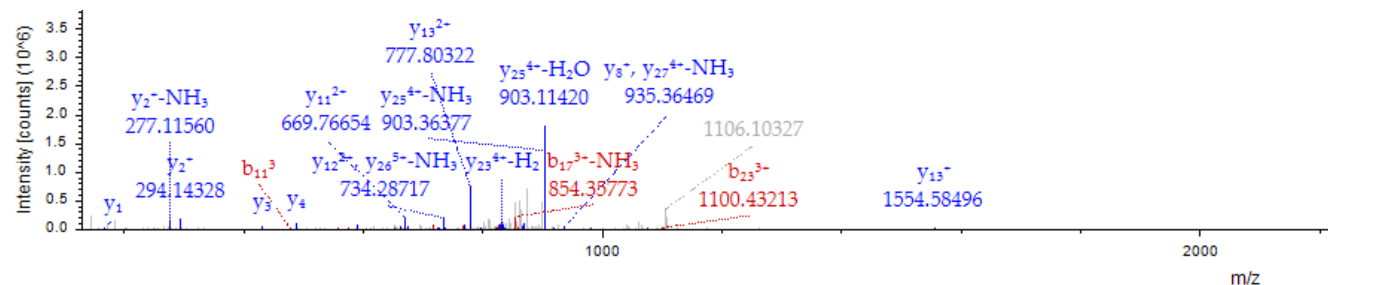



Figure S2E

TSR4<sup>688</sup>NPACGPQWEM<sup>\*</sup>SEWSECTAK<sup>706</sup>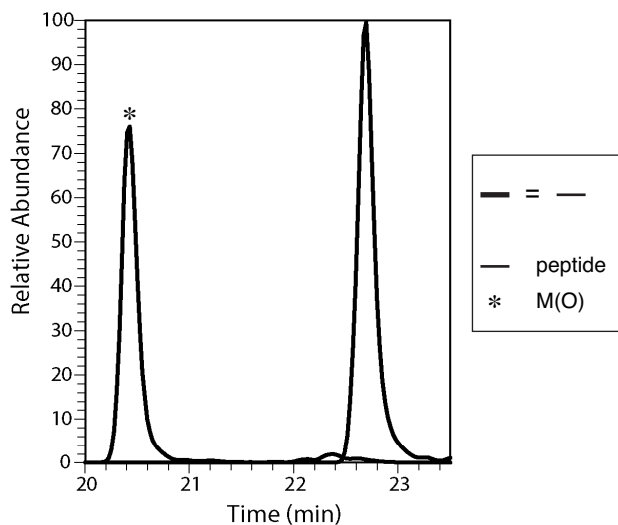

| #1 | b <sup>+</sup> | b <sup>2+</sup> | Seq.         | y <sup>+</sup> | y <sup>2+</sup> | #2 |
|----|----------------|-----------------|--------------|----------------|-----------------|----|
| 1  | 115.05020      | 58.02874        | N            |                |                 | 19 |
| 2  | 212.10297      | 106.55512       | P            | 2169.86744     | 1085.43736      | 18 |
| 3  | 283.14008      | 142.07368       | A            | 2072.81467     | 1036.91097      | 17 |
| 4  | 443.17073      | 222.08900       | C-Carbami... | 2001.77756     | 1001.39242      | 16 |
| 5  | 500.19219      | 250.59974       | G            | 1841.74691     | 921.37709       | 15 |
| 6  | 597.24496      | 299.12612       | P            | 1784.72545     | 892.86636       | 14 |
| 7  | 725.30353      | 363.15541       | Q            | 1687.67268     | 844.33998       | 13 |
| 8  | 911.38285      | 456.19506       | W            | 1559.61411     | 780.31069       | 12 |
| 9  | 1040.42544     | 520.71636       | E            | 1373.53479     | 687.27103       | 11 |
| 10 | 1187.46084     | 594.23406       | M-Oxidation  | 1244.49220     | 622.74974       | 10 |
| 11 | 1274.49287     | 637.75007       | S            | 1097.45680     | 549.23204       | 9  |
| 12 | 1403.53546     | 702.27137       | E            | 1010.42477     | 505.71602       | 8  |
| 13 | 1589.61477     | 795.31103       | W            | 881.38218      | 441.19473       | 7  |
| 14 | 1676.64680     | 838.82704       | S            | 695.30287      | 348.15507       | 6  |
| 15 | 1805.68940     | 903.34834       | E            | 608.27084      | 304.63906       | 5  |
| 16 | 1965.72004     | 983.36366       | C-Carbami... | 479.22824      | 240.11776       | 4  |
| 17 | 2066.76772     | 1033.88750      | T            | 319.19760      | 160.10244       | 3  |
| 18 | 2137.80484     | 1069.40606      | A            | 218.14992      | 109.57860       | 2  |
| 19 |                |                 | K            | 147.11280      | 74.06004        | 1  |

KZ040518\_3\_raw #6827 RT: 20.4463 min  
 FTMS, 1142.9596@hcd27.00, z=+2, Mono m/z=1142.45837 Da, MH+=2283.90947 Da, Match Tol =20 ppm

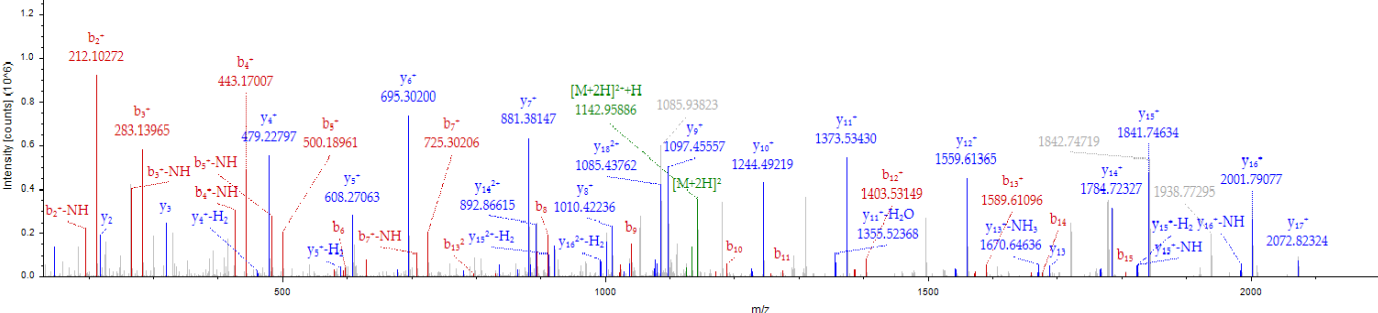

Figure S2F

TSR5<sup>746</sup>QWTVSDWGPCSGSCGQGR<sup>763</sup>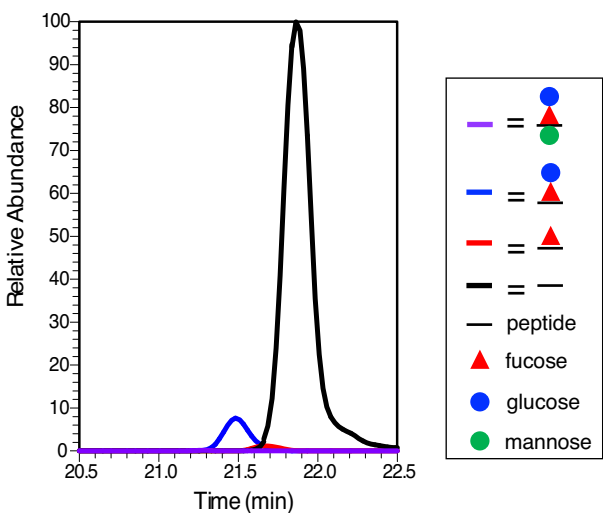

| #1 | b <sup>+</sup> | b <sup>2+</sup> | Seq.         | y <sup>+</sup> | y <sup>2+</sup> | #2 |
|----|----------------|-----------------|--------------|----------------|-----------------|----|
| 1  | 129.06585      | 65.03657        | Q            |                |                 | 18 |
| 2  | 315.14517      | 158.07622       | W            | 1896.77519     | 948.89123       | 17 |
| 3  | 416.19285      | 208.60006       | T            | 1710.69588     | 855.85158       | 16 |
| 4  | 515.26126      | 258.13427       | V            | 1609.64820     | 805.32774       | 15 |
| 5  | 602.29329      | 301.65028       | S            | 1510.57979     | 755.79353       | 14 |
| 6  | 717.32023      | 359.16375       | D            | 1423.54776     | 712.27752       | 13 |
| 7  | 903.39954      | 452.20341       | W            | 1308.52081     | 654.76405       | 12 |
| 8  | 960.42101      | 480.71414       | G            | 1122.44150     | 561.72439       | 11 |
| 9  | 1057.47377     | 529.24052       | P            | 1065.42004     | 533.21366       | 10 |
| 10 | 1217.50442     | 609.25585       | C-Carbami... | 968.36727      | 484.68728       | 9  |
| 11 | 1304.53645     | 652.77186       | S            | 808.33663      | 404.67195       | 8  |
| 12 | 1361.55791     | 681.28259       | S            | 721.30460      | 361.15594       | 7  |
| 13 | 1448.58994     | 724.79861       | G            | 664.28313      | 332.64521       | 6  |
| 14 | 1608.62059     | 804.81393       | C-Carbami... | 577.25111      | 289.12919       | 5  |
| 15 | 1665.64205     | 833.32466       | G            | 417.22046      | 209.11387       | 4  |
| 16 | 1793.70063     | 897.35395       | Q            | 360.19899      | 180.60314       | 3  |
| 17 | 1850.72209     | 925.86468       | G            | 232.14042      | 116.57385       | 2  |
| 18 |                |                 | R            | 175.11895      | 88.06311        | 1  |

KZ040518\_2.raw #7774 RT: 22.1356 min

FTMS, 1012.9209@hcd27.00, z=+2, Mono m/z=1012.92078 Da, MH+=2024.83428 Da, Match Tol.=20 ppm

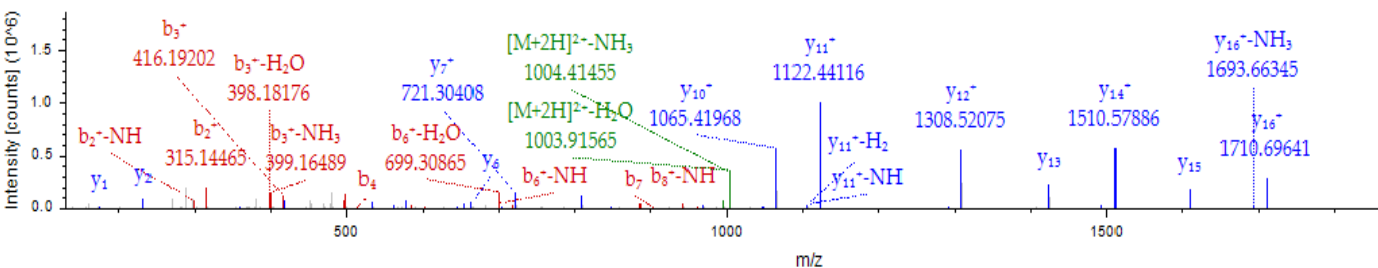

Figure S2G

TSR6<sup>799</sup>NCPAHLWAQDWER<sup>811</sup>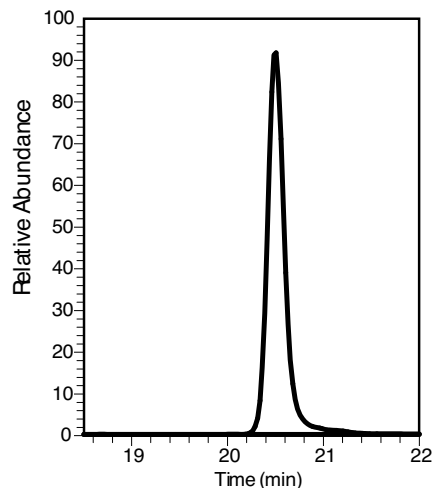

| #1 | b <sup>+</sup> | b <sup>2+</sup> | Seq.         | y <sup>+</sup> | y <sup>2+</sup> | #2 |
|----|----------------|-----------------|--------------|----------------|-----------------|----|
| 1  | 115.05020      | 58.02874        | N            |                |                 | 13 |
| 2  | 275.08085      | 138.04406       | C-Carbami... | 1568.70631     | 784.85679       | 12 |
| 3  | 372.13362      | 186.57045       | P            | 1408.67566     | 704.84147       | 11 |
| 4  | 443.17073      | 222.08900       | A            | 1311.62289     | 656.31509       | 10 |
| 5  | 580.22964      | 290.61846       | H            | 1240.58578     | 620.79653       | 9  |
| 6  | 766.30895      | 383.65812       | W            | 1103.52687     | 552.26707       | 8  |
| 7  | 879.39302      | 440.20015       | L            | 917.44756      | 459.22742       | 7  |
| 8  | 950.43013      | 475.71870       | A            | 804.36349      | 402.68538       | 6  |
| 9  | 1078.48871     | 539.74799       | Q            | 733.32638      | 367.16683       | 5  |
| 10 | 1193.51565     | 597.26146       | D            | 605.26780      | 303.13754       | 4  |
| 11 | 1379.59497     | 690.30112       | W            | 490.24086      | 245.62407       | 3  |
| 12 | 1508.63756     | 754.82242       | E            | 304.16155      | 152.58441       | 2  |
| 13 |                |                 | R            | 175.11895      | 88.06311        | 1  |

KZ040518\_3\_raw #6796 RT: 20.3756 min  
 FTMS, 841.8777@hcd27.00, z=+2, Mono m/z=841.87775 Da, MH+=1682.74822 Da, Match Tol =±20 ppm

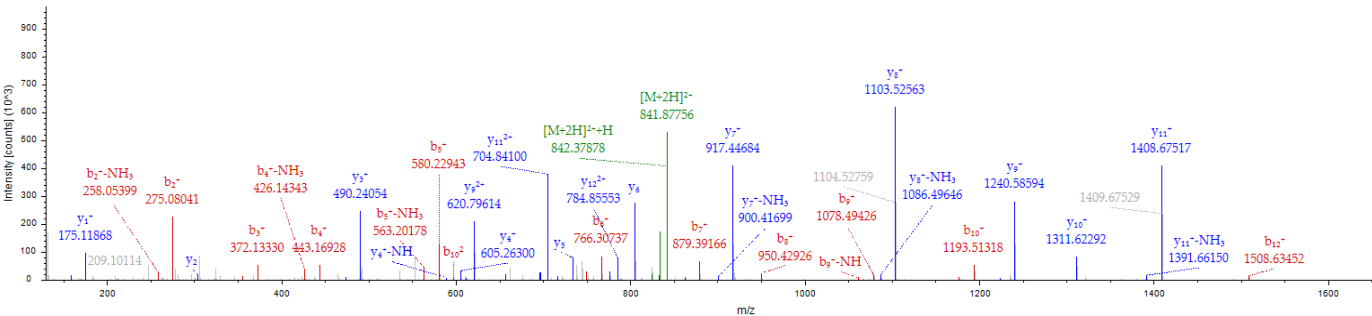

Figure S2H

TSR7<sup>869</sup>SECTKICGVGVRMRDVKCY<sup>887</sup>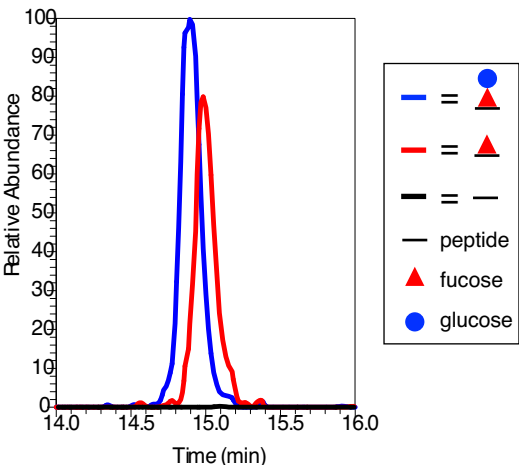

| #1 | b <sup>+</sup> | b <sup>2+</sup> | b <sup>3+</sup> | b <sup>4+</sup> | Seq.      | y <sup>+</sup> | y <sup>2+</sup> | y <sup>3+</sup> | y <sup>4+</sup> | #2 |
|----|----------------|-----------------|-----------------|-----------------|-----------|----------------|-----------------|-----------------|-----------------|----|
| 1  | 88.03930       | 44.52329        | 30.01795        | 22.76528        | S         |                |                 |                 |                 | 19 |
| 2  | 217.08190      | 109.04459       | 73.03215        | 55.02593        | E         | 2527.12954     | 1264.06841      | 843.04803       | 632.53784       | 18 |
| 3  | 377.11255      | 189.05991       | 126.37570       | 95.03359        | C-Carbami | 2398.08695     | 1199.54711      | 800.03383       | 600.27719       | 17 |
| 4  | 478.16022      | 239.58375       | 160.05826       | 120.29551       | T         | 2238.05630     | 1119.53179      | 746.69028       | 560.26953       | 16 |
| 5  | 606.25519      | 303.63123       | 202.75658       | 152.31925       | K         | 2137.00862     | 1069.00795      | 713.00772       | 535.00761       | 15 |
| 6  | 1015.41360     | 508.21044       | 339.14272       | 254.60886       | T-dHex(1) | 2008.91366     | 1004.96047      | 670.30940       | 502.98387       | 14 |
| 7  | 1175.44425     | 588.22576       | 392.48627       | 294.61652       | C-Carbami | 1599.75525     | 800.38126       | 533.92327       | 400.69427       | 13 |
| 8  | 1232.46571     | 616.73649       | 411.49342       | 308.87189       | G         | 1439.72460     | 720.36594       | 480.57972       | 360.68661       | 12 |
| 9  | 1331.53412     | 666.27070       | 444.51623       | 333.63899       | V         | 1382.70314     | 691.85521       | 461.57256       | 346.43124       | 11 |
| 10 | 1388.55559     | 694.78143       | 463.52338       | 347.89435       | G         | 1283.63472     | 642.32100       | 428.54976       | 321.66414       | 10 |
| 11 | 1487.62400     | 744.31564       | 496.54619       | 372.66146       | V         | 1226.61326     | 613.81027       | 409.54260       | 307.40877       | 9  |
| 12 | 1643.72511     | 822.36619       | 548.57989       | 411.68674       | R         | 1127.54484     | 564.27606       | 376.51980       | 282.64167       | 8  |
| 13 | 1774.76560     | 887.88644       | 592.26005       | 444.44686       | M         | 971.44373      | 486.22551       | 324.48610       | 243.61639       | 7  |
| 14 | 1930.86671     | 965.93699       | 644.29375       | 483.47213       | R         | 840.40325      | 420.70526       | 280.80593       | 210.85627       | 6  |
| 15 | 2045.89365     | 1023.45046      | 682.63607       | 512.22887       | D         | 694.30214      | 342.65471       | 228.77223       | 171.83099       | 5  |
| 16 | 2144.96207     | 1072.98467      | 715.65887       | 536.99597       | V         | 569.27520      | 285.14124       | 190.42992       | 143.07426       | 4  |
| 17 | 2273.05703     | 1137.03215      | 758.35719       | 569.01971       | K         | 470.20678      | 235.60703       | 157.40711       | 118.30715       | 3  |
| 18 | 2433.08768     | 1217.04748      | 811.70074       | 609.02738       | C-Carbami | 342.11182      | 171.55955       | 114.70879       | 86.28341        | 2  |
| 19 |                |                 |                 |                 | Y         | 182.08117      | 91.54422        | 61.38524        | 46.27575        | 1  |

KZ040518\_5\_raw #4608 RT: 14.7532 min

FTMS, 654.5459@hcd27.00, z=+4, Mono m/z=654.29620 Da, MH+=2614.16298 Da, Match Tol.=20 ppm

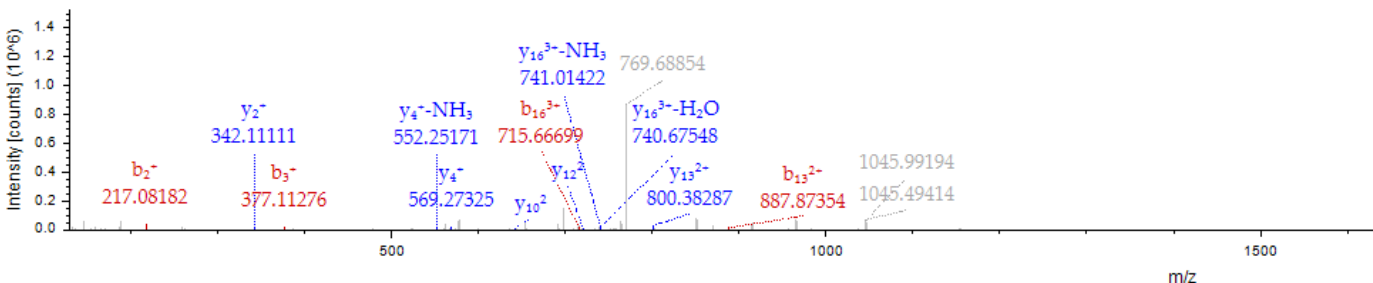

Figure S21

TSR7<sup>865</sup>TSPWSECTK**T**CGVGVRMRDVKCY<sup>887</sup>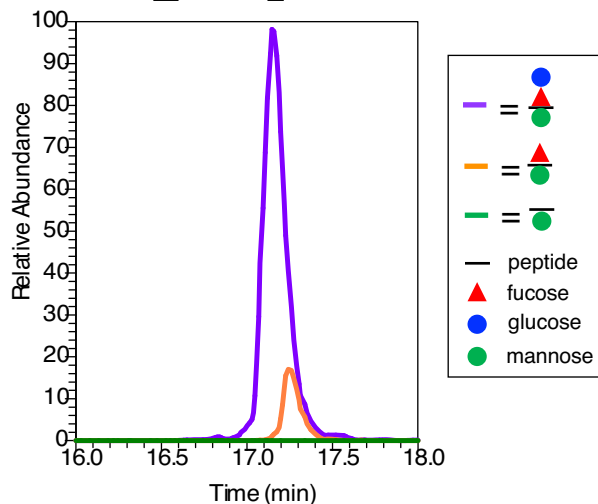

| #1 | b <sup>+</sup> | b <sup>2+</sup> | b <sup>3+</sup> | b <sup>4+</sup> | Seq.         | y <sup>+</sup> | y <sup>2+</sup> | y <sup>3+</sup> | y <sup>4+</sup> | #2 |
|----|----------------|-----------------|-----------------|-----------------|--------------|----------------|-----------------|-----------------|-----------------|----|
| 1  | 102.06496      | 51.53112        | 34.68984        | 26.26920        | T            |                |                 |                 |                 | 23 |
| 2  | 189.08698      | 95.04713        | 63.70051        | 48.02720        | S            | 3146.37850     | 1573.69289      | 1049.46435      | 787.35008       | 22 |
| 3  | 286.13975      | 143.57351       | 96.05143        | 72.29039        | P            | 3059.34647     | 1530.17687      | 1020.45367      | 765.59208       | 21 |
| 4  | 634.27188      | 317.63958       | 212.09548       | 159.32343       | W-Hex        | 2962.29371     | 1481.65049      | 988.10275       | 741.32888       | 19 |
| 5  | 721.30391      | 361.15559       | 241.10616       | 181.08144       | S            | 2614.16157     | 1307.58442      | 872.05871       | 654.29585       | 20 |
| 6  | 850.34651      | 425.67689       | 284.12035       | 213.34208       | E            | 2527.12954     | 1264.06841      | 843.04803       | 632.53784       | 18 |
| 7  | 1010.37715     | 505.69222       | 337.46390       | 253.34975       | C-Carbami... | 2398.08695     | 1199.54711      | 800.03383       | 600.27719       | 17 |
| 8  | 1111.42483     | 556.21605       | 371.14646       | 278.61167       | T            | 2238.09630     | 1119.53179      | 746.69028       | 560.26953       | 16 |
| 9  | 1239.51980     | 620.26354       | 413.84478       | 310.63541       | K            | 2137.00862     | 1069.00795      | 713.00772       | 535.00761       | 15 |
| 10 | 1648.67821     | 824.34274       | 550.23092       | 412.92501       | T-dHex(1)    | 2008.91366     | 1004.96047      | 670.30940       | 502.98387       | 14 |
| 11 | 1808.70885     | 904.85807       | 603.57447       | 452.93267       | C-Carbami... | 1599.75525     | 800.38126       | 533.92327       | 400.69427       | 13 |
| 12 | 1865.73032     | 933.36880       | 622.58162       | 467.18804       | G            | 1439.72460     | 720.36594       | 480.57972       | 360.68661       | 12 |
| 13 | 1964.79873     | 982.30300       | 655.60443       | 491.95514       | V            | 1382.70314     | 691.85521       | 461.57256       | 346.43124       | 11 |
| 14 | 2021.82020     | 1011.41374      | 674.61158       | 506.21051       | G            | 1283.63472     | 642.32100       | 428.54976       | 321.66414       | 10 |
| 15 | 2120.88861     | 1060.94794      | 707.63439       | 530.97761       | V            | 1226.61326     | 613.81027       | 409.54260       | 307.40877       | 9  |
| 16 | 2276.98972     | 1138.99850      | 759.66809       | 570.00289       | R            | 1127.54484     | 564.27606       | 376.51980       | 282.64167       | 8  |
| 17 | 2408.03020     | 1204.51874      | 803.34825       | 602.76301       | M            | 971.44373      | 486.22551       | 324.48610       | 243.61639       | 7  |
| 18 | 2564.13132     | 1282.56930      | 855.38196       | 641.78829       | R            | 840.40325      | 420.70526       | 280.80993       | 210.89627       | 6  |
| 19 | 2679.15826     | 1340.08277      | 893.72427       | 670.54502       | D            | 684.30214      | 342.65471       | 228.77223       | 171.83099       | 5  |
| 20 | 2778.22667     | 1389.61697      | 926.74708       | 695.31213       | V            | 569.27520      | 285.14124       | 190.42992       | 143.07426       | 4  |
| 21 | 2906.32164     | 1453.66446      | 969.44540       | 727.33587       | K            | 470.20678      | 235.60703       | 157.40711       | 118.30715       | 3  |
| 22 | 3066.35228     | 1533.67978      | 1022.78895      | 767.34353       | C-Carbami... | 342.11182      | 171.56965       | 114.70879       | 86.28341        | 2  |
| 23 |                |                 |                 |                 | Y            | 182.08117      | 91.54422        | 61.36524        | 46.27575        | 1  |

KZ051018\_4\_raw #4806 RT: 17.1246 min

FTMS, 813.1097@hcd27.00, z=+4, Mono m/z=812.60834 Da, MH+=3247.41152 Da, Match Tol.=20 ppm

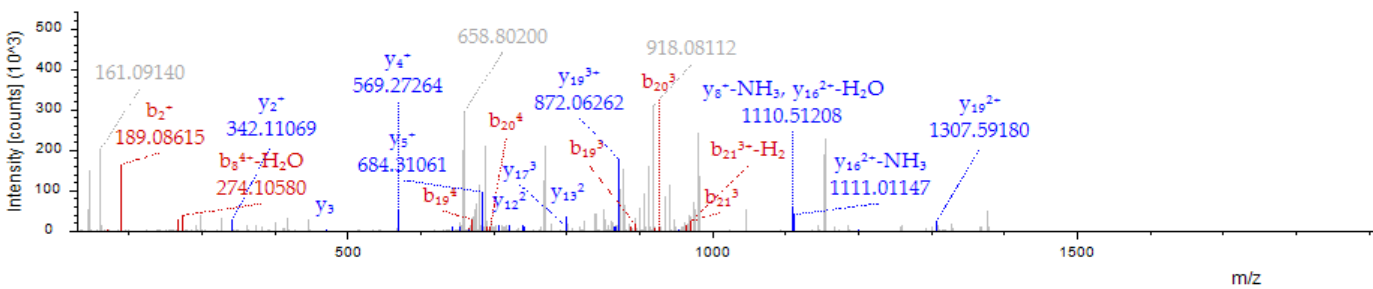

Figure S3

TSR3 S641L <sup>623</sup>CAGRECQPRWETSSWSECLRICGEGHQF<sup>650</sup>

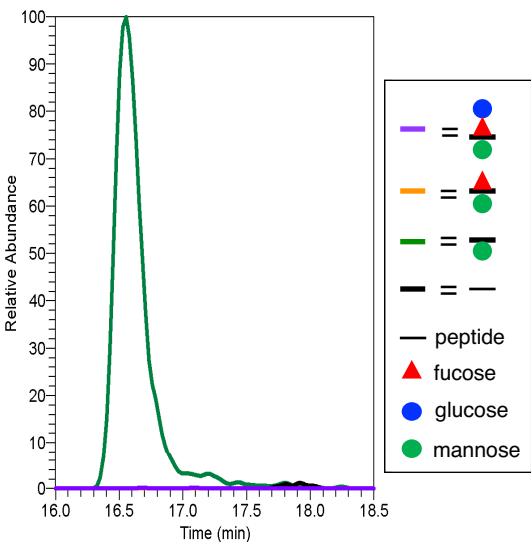

| #1 | b <sup>+</sup> | b <sup>2+</sup> | b <sup>3+</sup> | b <sup>4+</sup> | b <sup>5+</sup> | Seq.         | y <sup>+</sup> | y <sup>2+</sup> | y <sup>3+</sup> | y <sup>4+</sup> | y <sup>5+</sup> | #2 |
|----|----------------|-----------------|-----------------|-----------------|-----------------|--------------|----------------|-----------------|-----------------|-----------------|-----------------|----|
| 1  | 161.03793      | 81.02260        | 54.35083        | 41.01494        | 33.01341        | C-Carbami... |                |                 |                 |                 |                 | 28 |
| 2  | 232.07504      | 116.54116       | 78.02986        | 58.77422        | 47.22083        | A            | 3473.46920     | 1737.23824      | 1158.49458      | 869.12276       | 696.49966       | 27 |
| 3  | 289.09650      | 145.05189       | 97.03702        | 73.02958        | 58.62512        | G            | 3402.43208     | 1701.71968      | 1134.81555      | 851.36348       | 681.29224       | 26 |
| 4  | 445.19761      | 223.10245       | 149.07072       | 112.05496       | 89.84634        | R            | 3345.41062     | 1673.20895      | 1115.80039      | 837.10811       | 669.89795       | 25 |
| 5  | 574.24021      | 287.62374       | 192.08492       | 144.31551       | 115.65306       | E            | 3189.30951     | 1595.15039      | 1063.77469      | 798.08283       | 638.66772       | 24 |
| 6  | 734.27085      | 367.63907       | 245.42847       | 184.32317       | 147.65999       | C-Carbami... | 3060.26691     | 1530.63710      | 1020.76049      | 765.82219       | 612.85920       | 23 |
| 7  | 862.32943      | 431.66835       | 288.11466       | 216.33782       | 173.27171       | Q            | 2900.23627     | 1450.62177      | 967.41694       | 725.81452       | 580.85307       | 22 |
| 8  | 969.38220      | 480.19474       | 320.46558       | 240.60101       | 192.68226       | P            | 2772.17769     | 1386.59248      | 924.73075       | 693.79988       | 585.24136       | 21 |
| 9  | 1115.48331     | 558.24529       | 372.49929       | 279.62628       | 223.90248       | R            | 2675.12493     | 1338.06610      | 892.37983       | 669.53669       | 535.83081       | 20 |
| 10 | 1301.56262     | 651.28495       | 434.52572       | 326.14611       | 261.11835       | W            | 2519.02381     | 1260.01595      | 840.34612       | 630.51141       | 504.61058       | 19 |
| 11 | 1430.60521     | 715.80624       | 477.53992       | 358.40676       | 286.92686       | E            | 2332.94450     | 1166.97589      | 778.31968       | 583.99158       | 467.39472       | 18 |
| 12 | 1531.65289     | 766.33008       | 511.22248       | 383.66688       | 307.13640       | T            | 2203.90191     | 1102.45459      | 735.30549       | 551.73093       | 441.58620       | 17 |
| 13 | 1618.68492     | 809.84610       | 540.23316       | 405.42669       | 324.54281       | S            | 2102.85423     | 1051.93075      | 701.62293       | 526.46901       | 421.37667       | 16 |
| 14 | 1705.71695     | 853.36211       | 569.24383       | 427.18469       | 341.94921       | S            | 2015.82220     | 1008.41474      | 672.61225       | 504.71101       | 403.97026       | 15 |
| 15 | 2053.84909     | 1027.42818      | 685.28788       | 514.21773       | 411.57564       | W-Hex        | 1928.79017     | 964.89872       | 643.60158       | 482.95300       | 386.56386       | 14 |
| 16 | 2140.88111     | 1070.94420      | 714.28956       | 538.97574       | 428.98204       | S            | 1580.65804     | 790.83266       | 527.55763       | 395.91997       | 316.93743       | 13 |
| 17 | 2289.92371     | 1135.46549      | 757.31275       | 568.23638       | 454.79056       | E            | 1493.62601     | 747.31664       | 498.54685       | 374.16196       | 299.53102       | 12 |
| 18 | 2429.95435     | 1215.48082      | 810.65630       | 608.24405       | 486.79669       | C-Carbami... | 1364.68342     | 682.79535       | 455.53266       | 341.90131       | 273.72250       | 11 |
| 19 | 2543.03842     | 1272.02285      | 848.35059       | 636.51506       | 509.41351       | L            | 1204.55277     | 602.78002       | 402.18911       | 301.89365       | 241.71637       | 10 |
| 20 | 2639.13953     | 1350.07340      | 900.38469       | 675.54034       | 540.63373       | R            | 1091.46870     | 546.23739       | 364.49442       | 273.62263       | 219.09666       | 9  |
| 21 | 2800.18721     | 1400.59724      | 934.06725       | 700.80226       | 560.84326       | T            | 935.36759      | 468.18743       | 312.46071       | 234.59736       | 187.87934       | 8  |
| 22 | 2960.21786     | 1480.61257      | 987.41080       | 740.80992       | 592.84930       | C-Carbami... | 834.31991      | 417.66359       | 278.78716       | 209.33544       | 167.68980       | 7  |
| 23 | 3017.23932     | 1508.12330      | 1006.41796      | 756.06529       | 604.25369       | G            | 674.28926      | 337.64827       | 225.43461       | 169.32777       | 135.66367       | 6  |
| 24 | 3146.28191     | 1573.64459      | 1049.43216      | 787.32594       | 630.06220       | E            | 617.26780      | 309.13754       | 206.42745       | 155.07241       | 124.25938       | 5  |
| 25 | 3203.30388     | 1602.15533      | 1068.43991      | 801.58130       | 641.46650       | G            | 488.22521      | 244.61624       | 163.41325       | 122.81176       | 96.45086        | 4  |
| 26 | 3340.36229     | 1670.68478      | 1114.12561      | 835.84603       | 668.87828       | H            | 431.20374      | 216.10551       | 144.40610       | 108.55699       | 87.04657        | 3  |
| 27 | 3468.42087     | 1734.71407      | 1156.81181      | 867.86067       | 694.48999       | Q            | 294.14483      | 147.57805       | 98.71980        | 74.29167        | 59.63479        | 2  |
| 28 |                |                 |                 |                 |                 | F            | 166.08826      | 83.54677        | 56.03360        | 42.27702        | 34.02307        | 1  |

KZ090619\_3.raw #5342 RT: 16.6369 min

FTMS, 727.9048@hcd27.00, z=+5, Mono m/z=727.50470 Da, MH+=3633.49439 Da, Match Tol.=20 ppm

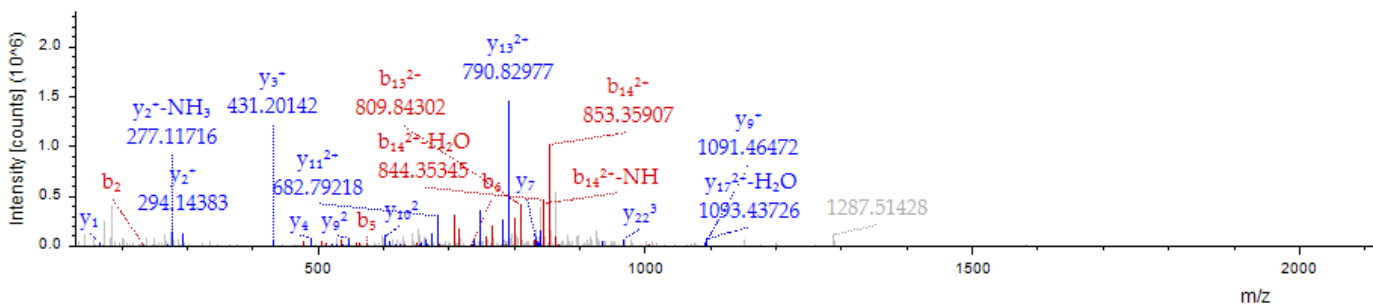

Figure S4

A

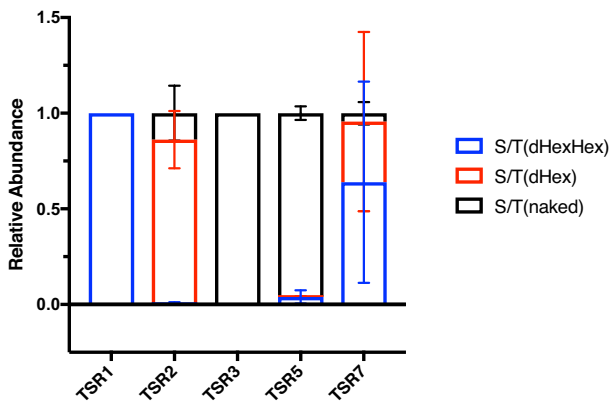

B

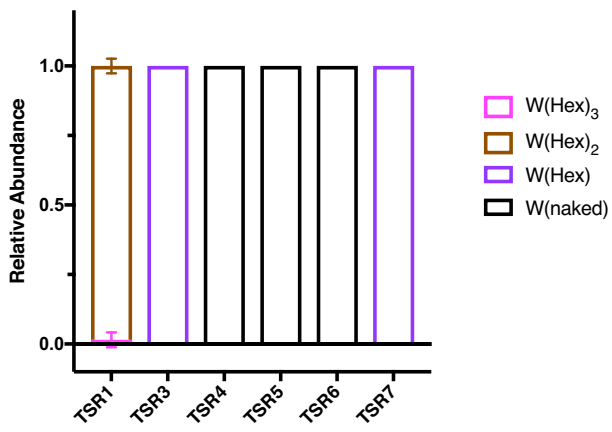

Supplement: supp_RA120.014557_161125_2_supp_590554_qfzf2h.pdf [file supp_RA120.014557_161125_2_supp_590554_qfzf2h.pdf]
